# Supplementary material
Source: ML conference proceedings conference paper supplement (https://proceedings.neurips.cc/paper_files/paper/2015/hash/1c65cef3dfd1e00c0b03923a1c591db4-Abstract.html)

Supplement to ' $b$ -bit Marginal Regression':  
full set of experimental results

## Empirical verification of the analysis of Section 3

$\sigma = 0$

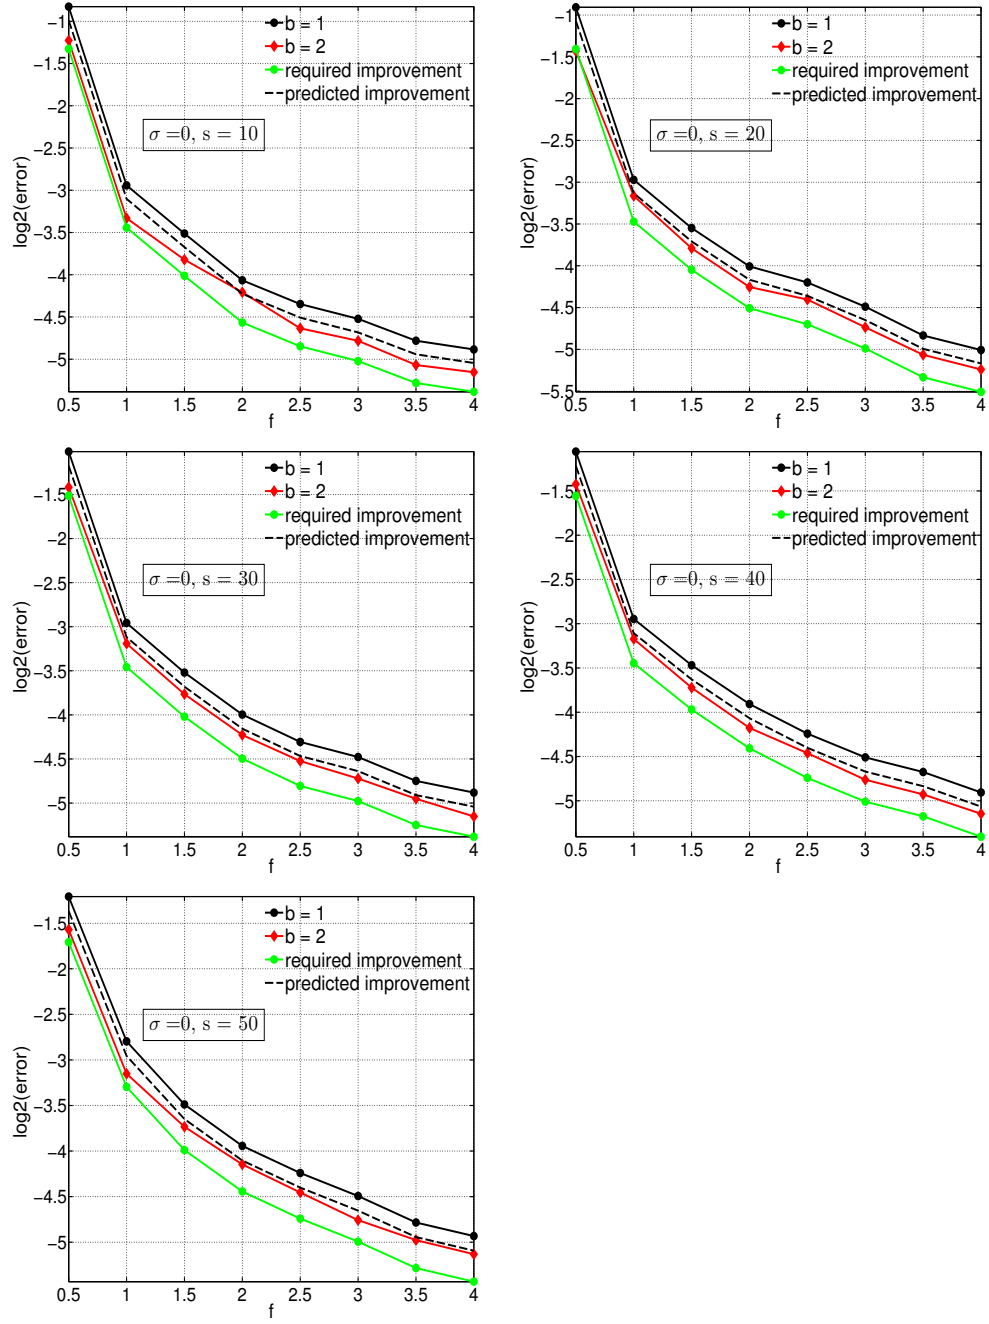

$\sigma = 1$

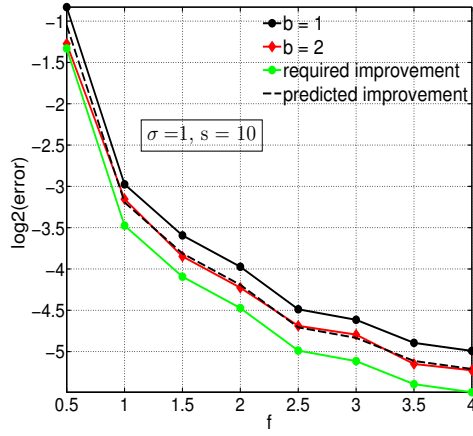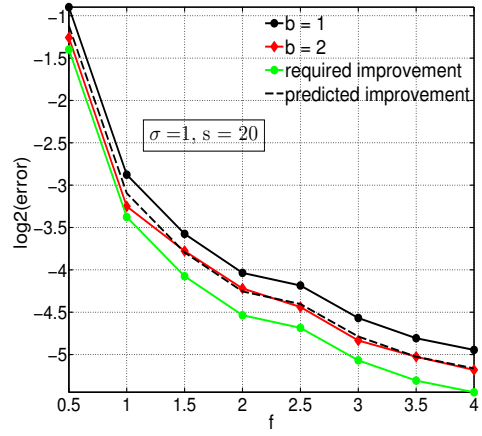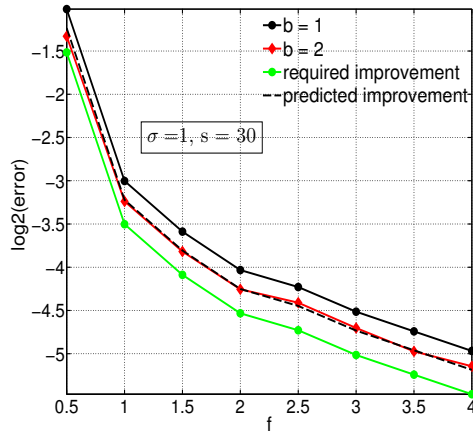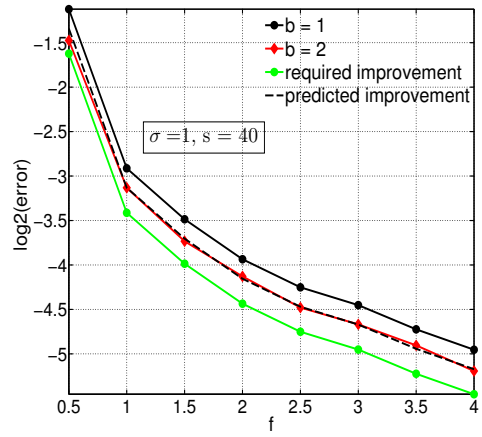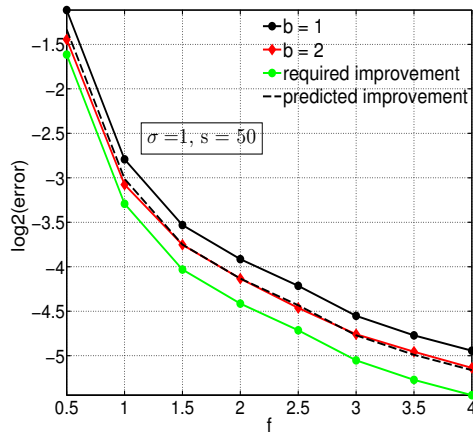

$\sigma = 2$

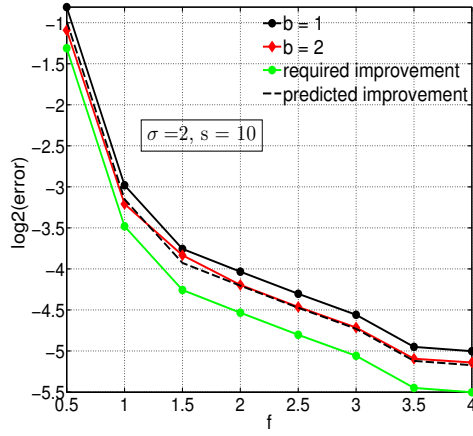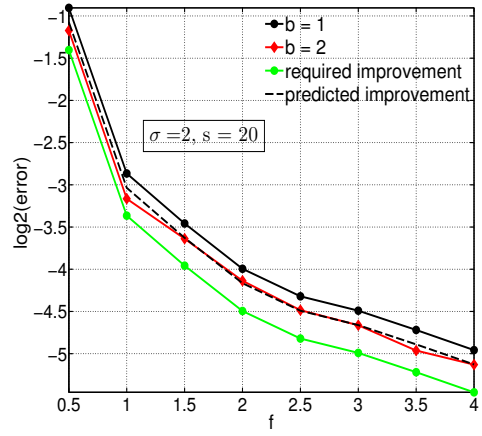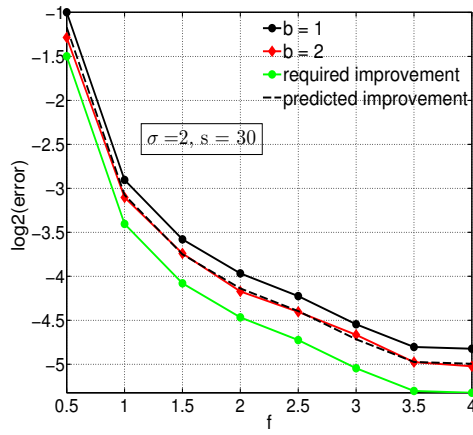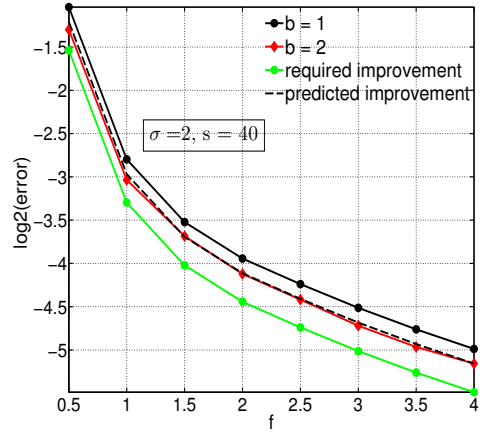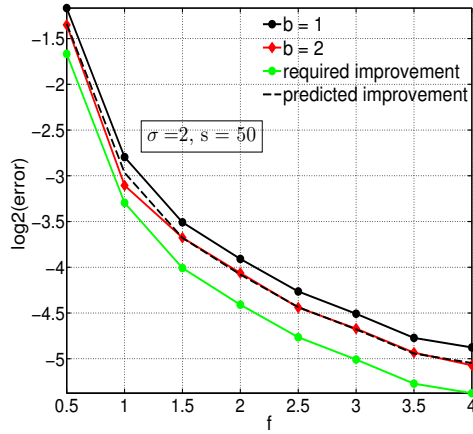

## Estimation of the scale and the noise level

### Estimation of the scale parameter

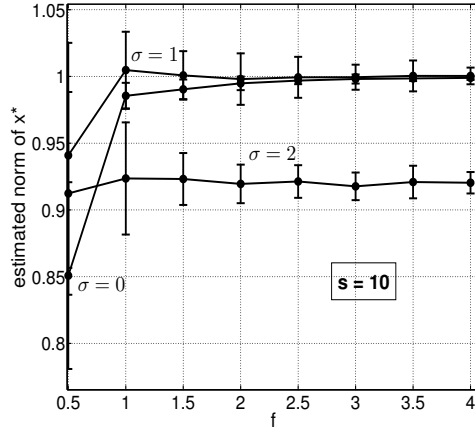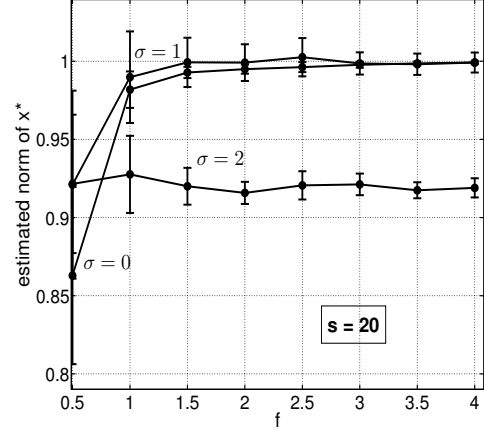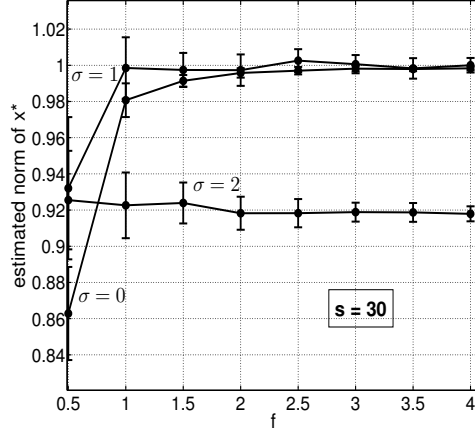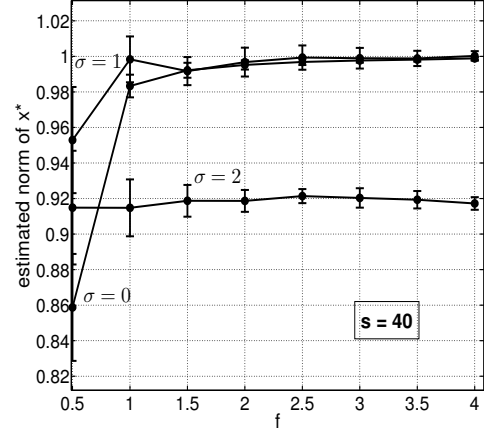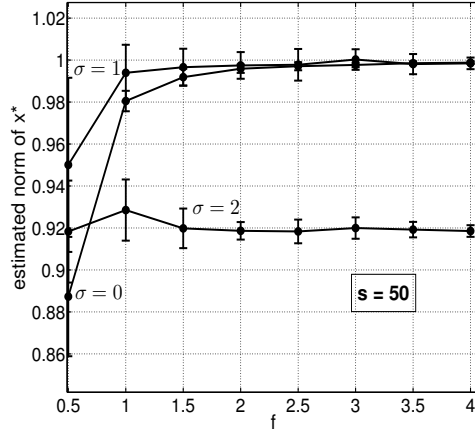

## Estimation of the noise level

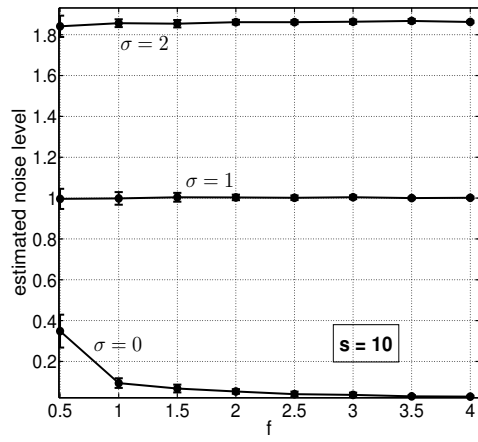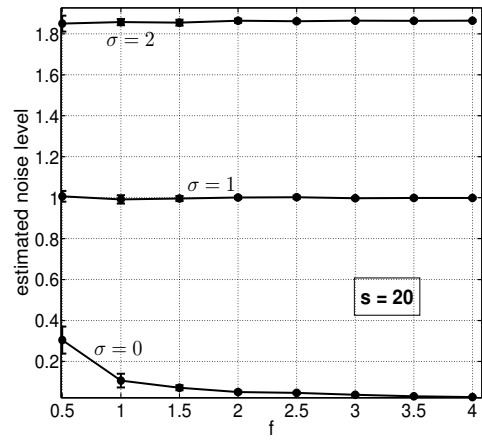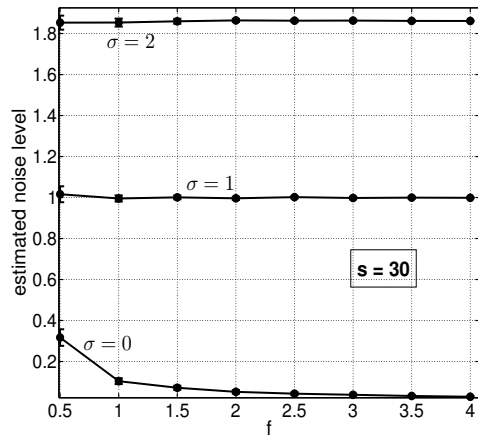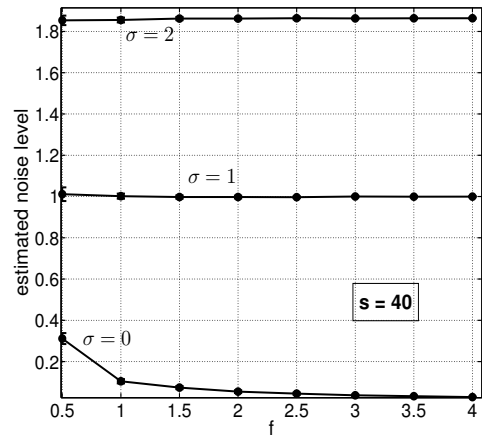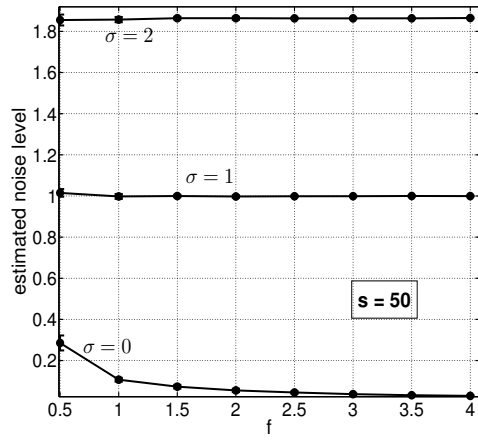

# $b$ -bit Marginal Regression and alternative recovery algorithms

$b = 1, \sigma = 0$

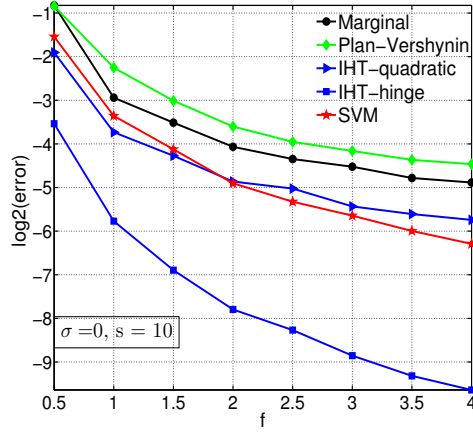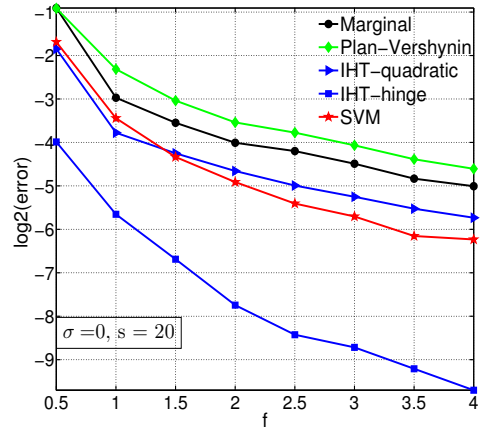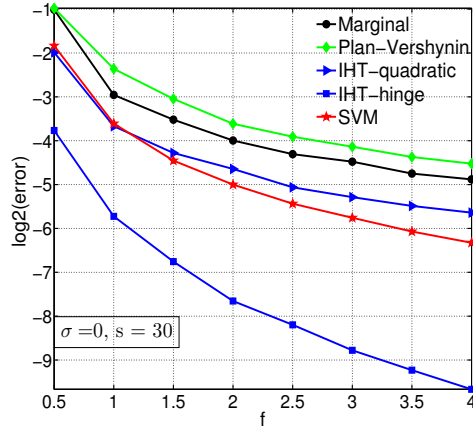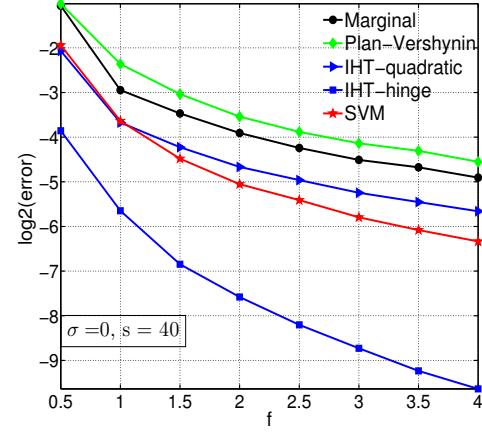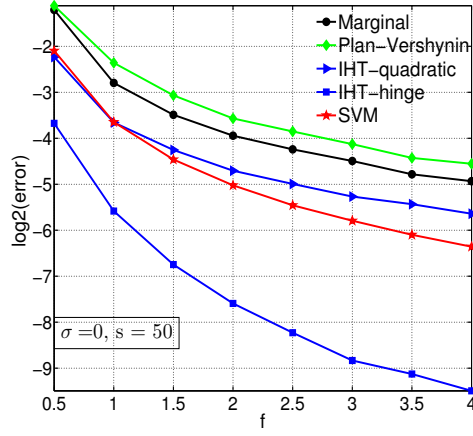

$b = 2, \sigma = 0$

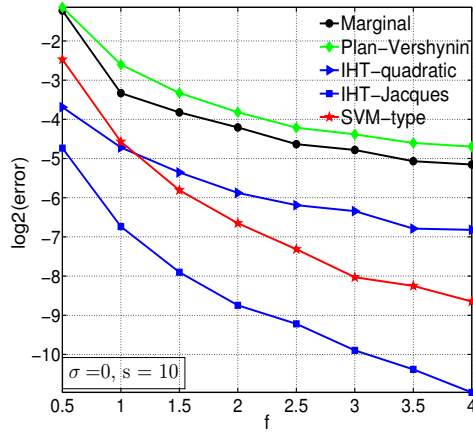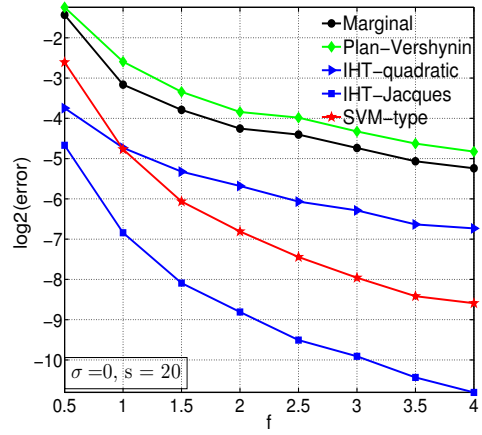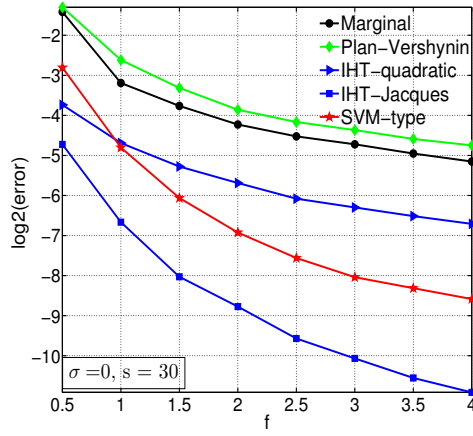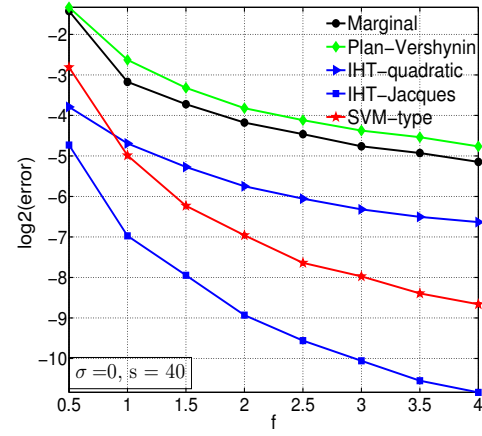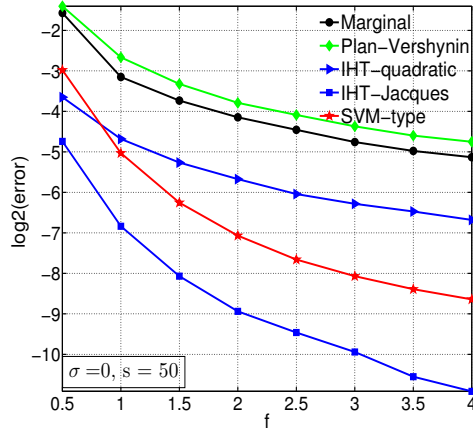



$$b = 1, \sigma = 1$$

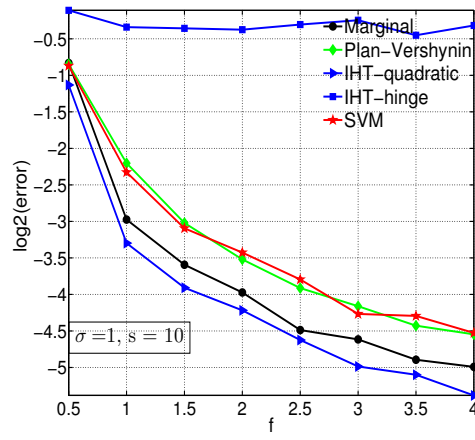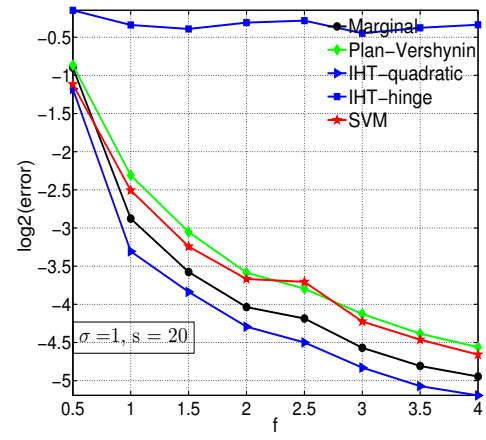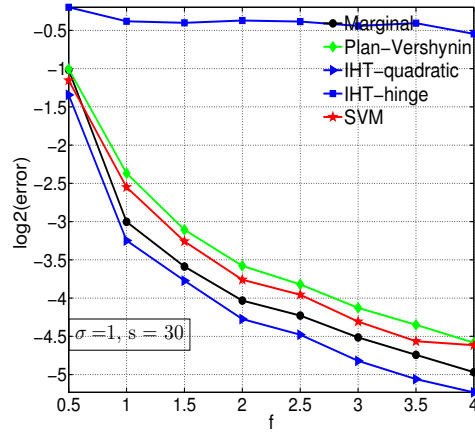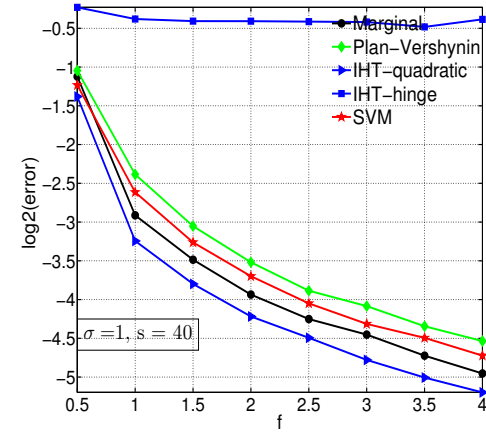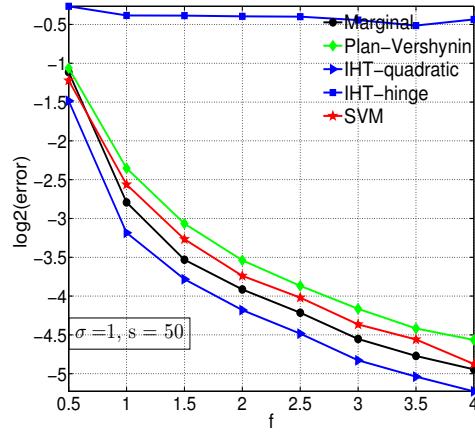

$b = 2, \sigma = 1$

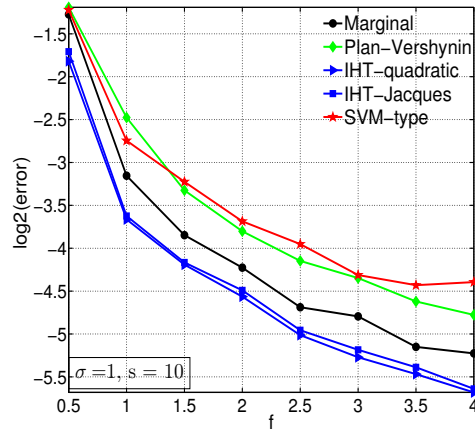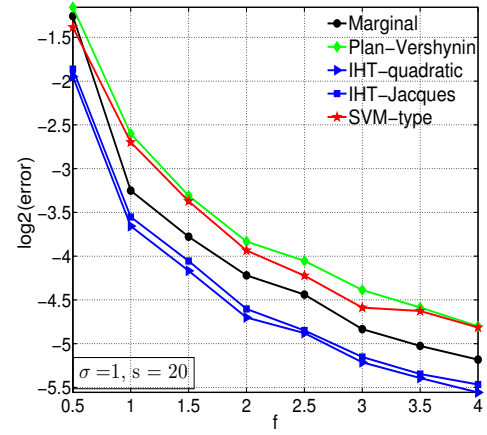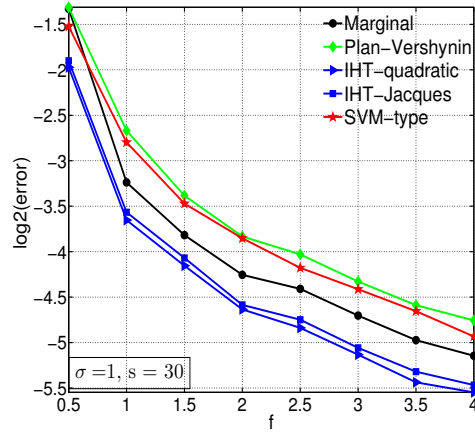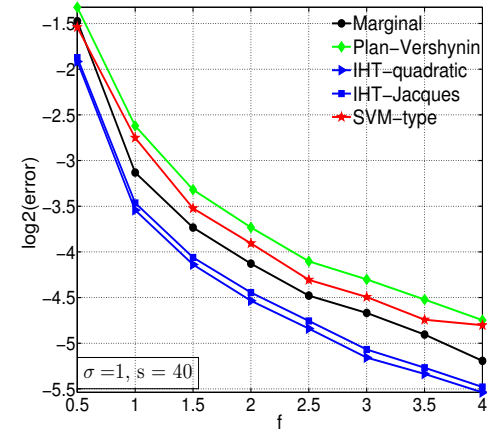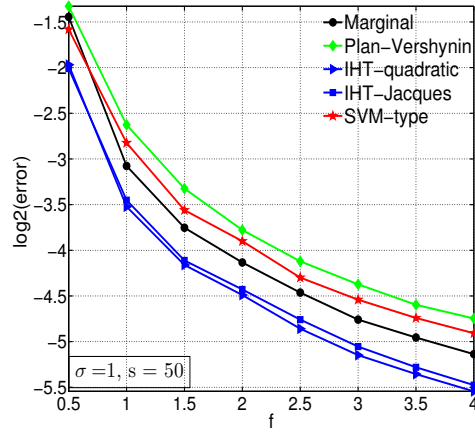

$$b = 1, \sigma = 2$$

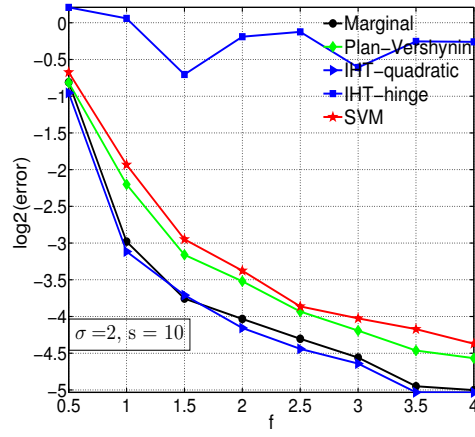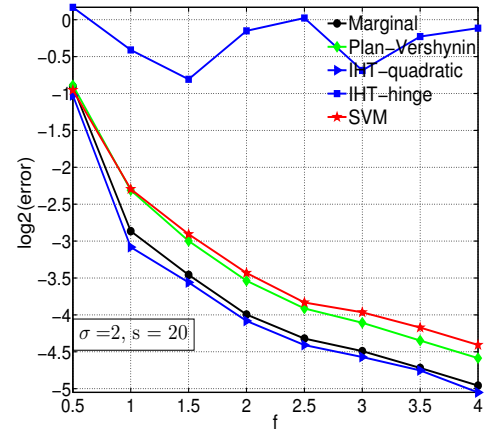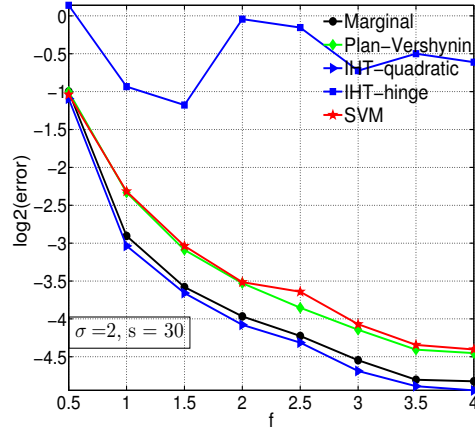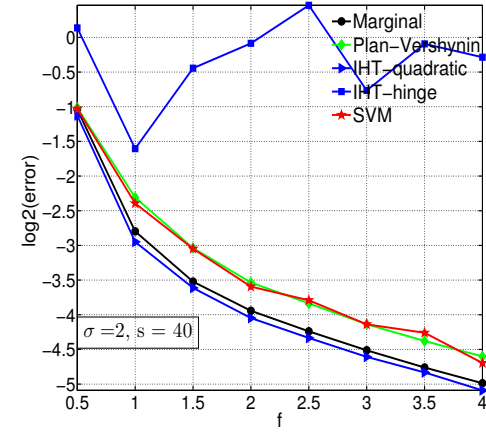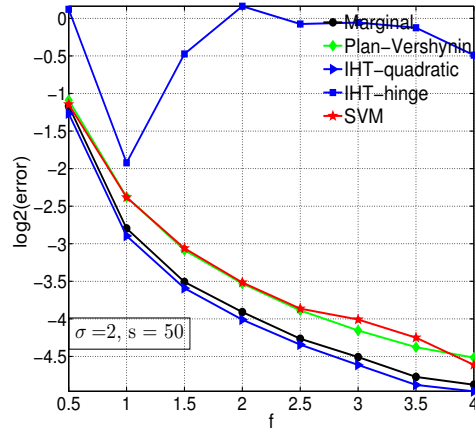

$b = 2, \sigma = 2$

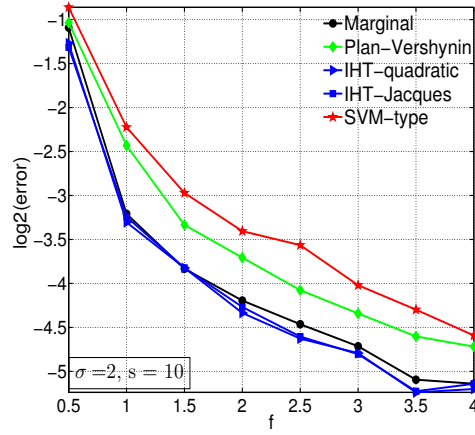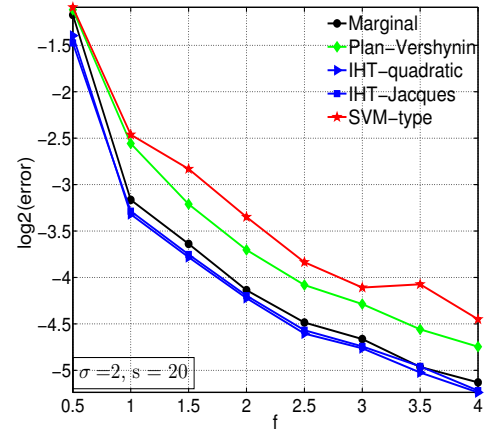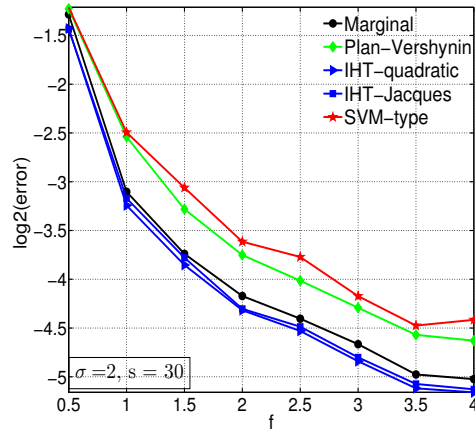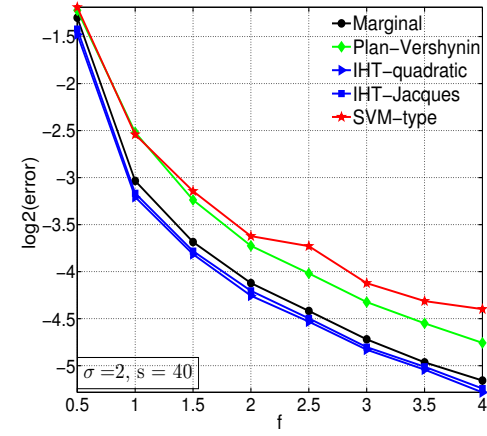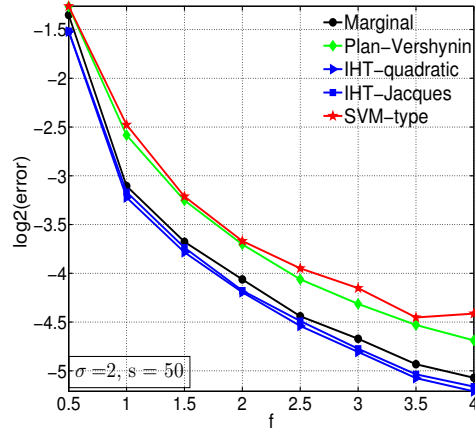

Supplement: Supplementary file [file 1c65cef3dfd1e00c0b03923a1c591db4-Supplemental.zip]
