# Supplementary material
Source: ML conference proceedings conference paper supplement (https://proceedings.neurips.cc/paper_files/paper/2015/hash/1c65cef3dfd1e00c0b03923a1c591db4-Abstract.html)
Supplement: Supplementary file [file 1c65cef3dfd1e00c0b03923a1c591db4-Supplemental.zip]

# Supplement to 'b-bit Marginal Regression': proofs and derivations

## A Proof of Proposition 1

The proof relies on concentration properties of  $\chi^2$ -random variables which can be found in [4], Section J.

**Lemma A.1.** *Let  $Z \sim \chi^2(d)$ . Then we have for any  $t \in (0, 1/2)$*

$$\begin{aligned}\mathbf{P}(Z \geq d(1+t)) &\leq \exp\left(-\frac{3}{16}dt^2\right), \\ \mathbf{P}(Z \leq d(1-t)) &\leq \exp\left(-\frac{1}{4}dt^2\right).\end{aligned}$$

*Proof.* (**Proposition 1**) Note that  $\mathbf{E}[\eta] = \mathbf{E}[A^\top y/m] = \mathbf{E}[A^\top (Ax^* + \varepsilon)/m] = x^*$ , where the expectation is w.r.t. both  $A$  and  $\varepsilon$ . In the sequel, we will show that

$$\max_{1 \leq j \leq n} |\eta_j - \mathbf{E}[\eta_j]| = \max_{1 \leq j \leq n} \left| \frac{A_j^\top y}{m} - \mathbf{E} \left[ \frac{A_j^\top y}{m} \right] \right| \leq C_0(\|x^*\|_2 + \sigma) \sqrt{\frac{\log n}{m}}. \quad (1)$$

with probability at least  $1 - cn^{-1}$ , for suitable constants  $c, C_0 > 0$ . This already implies the assertion of the proposition, as shown below. Denote

$$Q(x^*) = \left\{ j \in [n] : |x_j^*| > 2C_0(\|x^*\|_2 + \sigma) \sqrt{\frac{\log n}{m}} \right\} \subseteq S(x^*).$$

Note that under the event (1),  $Q(x^*) \subseteq S(\hat{x})$ . Indeed, by the definition of  $\hat{x}$ , its support  $S(\hat{x})$  contains the indices corresponding to the  $s$  largest entries of  $\eta$  (in absolute magnitude), and under event (1) it holds that  $\min_{j \in Q(x^*)} |\eta_j| > \max_{j \in [n] \setminus S(x^*)} |\eta_j|$ . We thus bound

$$\begin{aligned}\|\hat{x} - x^*\|_\infty &= \max\{\|\hat{x}_{Q(x^*)} - x_{Q(x^*)}^*\|_\infty, \|\hat{x}_{S(x^*) \setminus Q(x^*)} - x_{S(x^*) \setminus Q(x^*)}^*\|_\infty, \|\hat{x}_{[n] \setminus S(x^*)}\|_\infty\} \\ &\leq \max\{\|\eta_{Q(x^*)} - \mathbf{E}[\eta_{Q(x^*)}]\|_\infty, \|\eta_{S(x^*) \setminus Q(x^*)} - \mathbf{E}[\eta_{S(x^*) \setminus Q(x^*)}]\|_\infty, \\ &\quad \|\eta_{[n] \setminus S(x^*)}\|_\infty\} \\ &\stackrel{(1)}{\leq} 2C_0(\|x^*\|_2 + \sigma) \sqrt{\frac{\log n}{m}}.\end{aligned}$$

To conclude that this yields the assertion of the proposition with  $C = 2\sqrt{2}C_0$ , we use

$$\|\hat{x} - x^*\|_2 \leq \sqrt{\|\hat{x} - x^*\|_0} \|\hat{x} - x^*\|_\infty \leq \sqrt{2s} \|\hat{x} - x^*\|_\infty.$$

The bound (1) can be established by standard concentration arguments. Applying the second result from Lemma A.1 with  $d = m$ ,  $t = \sqrt{8 \log(n)/m}$ , and using a union bound, we obtain under the assumption that  $m \geq 32 \log n$

$$\begin{aligned}\mathbf{P}\left(\min_{1 \leq j \leq n} \|A_j\|_2^2 \leq m - \sqrt{m} \sqrt{8 \log(n)}\right) &\leq \frac{1}{n} \\ \iff \mathbf{P}\left(\min_{1 \leq j \leq n} \|A_j\|_2^2/m \leq 1 - \sqrt{8 \log(n)/m}\right) &\leq \frac{1}{n}.\end{aligned}$$

Similarly, invoking the first result of Lemma A.1 under the assumption that  $m \geq (128/3) \log n$

$$\begin{aligned} & \mathbf{P} \left( \max_{1 \leq j \leq n} \|A_j\|_2^2/m \geq 1 + \sqrt{(32/3) \log(n)/m} \right) \leq 1/n \\ \implies & \mathbf{P} \left( \max_{1 \leq j \leq n} \|A_j\|_2^2 \geq 2m \right) \leq 1/n. \end{aligned}$$

Moreover, conditional on the event  $\bigcap_{j \in [n]} \{\|A_j\|_2 \leq \kappa\}$  with  $\kappa = \sqrt{2m}$ , we have

$$\mathbf{P} \left( \max_{1 \leq j \leq n} \left| \frac{1}{m} \sum_{k \neq j} \langle A_j, A_k \rangle x_k^* \right| > t \|x^*\|_2 \right) \leq 2n \exp(-m^2 t^2 / (2\kappa^2)) \leq 2n \exp(-mt^2/4), \quad (2)$$

by a standard Gaussian tail bound. Hence, choosing  $t = \sqrt{8 \log(n)/m}$ , we obtain

$$\mathbf{P} \left( \max_{1 \leq j \leq n} \left| \frac{1}{m} \sum_{k \neq j} \langle A_j, A_k \rangle x_k^* \right| > \|x^*\|_2 \sqrt{8 \log(n)/m} \right) \leq 2/n.$$

Altogether, we have with probability at least  $1 - 4/n$

$$|A_j^\top (Ax^*)/m - x_j^*| \leq \left| \left(1 - \frac{\|A_j\|_2^2}{m}\right) x_j^* \right| + \left| \frac{1}{m} \sum_{k \neq j} \langle A_j, A_k \rangle x_k^* \right| \leq C_0 \|x^*\|_2 \sqrt{\log(n)/m},$$

simultaneously for all  $j \in [n]$ , thereby establishing (1) with  $C_0 = \sqrt{32/3} + \sqrt{8}$  for  $\sigma = 0$ . The case  $\sigma > 0$  follows immediately by the triangle inequality

$$|A_j^\top (Ax^* + \varepsilon)/m - x_j^*| \leq |A_j^\top (Ax^*)/m - x_j^*| + |A_j^\top \varepsilon/m|, \quad j \in [n],$$

and a concentration inequality for  $\max_{1 \leq j \leq n} |A_j^\top \varepsilon/m|$  similarly to (2).  $\square$

## B Proof of Lemma 1

*Proof.* Let  $\emptyset \neq S \subseteq \{1, \dots, n\}$ . Then for any unit vector  $x$  supported on  $S$ ,  $\langle \eta, x \rangle \leq \|\eta_S\|_2$  which is attained by setting  $x_S = \eta_S / \|\eta_S\|_2$ . Consequently,

$$\min_{x: \|x\|_2 \leq 1, \|x\|_0 \leq s} -\langle \eta, x \rangle = \min_{S: |S| \leq s} -\|\eta_S\|_2.$$

The optimization problem on the right hand side can be solved by finding the index set of the  $s$  largest component (in absolute magnitude) in  $\eta$ . This yields the claim.  $\square$

## C Proof of Proposition 2

For the next proof (and others below), we need the following Lemma

**Lemma C.1.** *For all  $x \in \mathbb{R}^n$ , we have  $\mathbf{E}[\langle x, \eta \rangle] = \lambda \langle x, x_u^* \rangle$ . In particular, by considering  $x = e_j$ ,  $j \in [n]$ , where  $\{e_j\}_{j=1}^n$  is the standard basis of  $\mathbb{R}^n$ , we have  $\mathbf{E}[\eta] = \lambda x_u^*$ .*

*Proof.*

$$\begin{aligned}
\mathbf{E}[\langle x, \eta \rangle] &= \mathbf{E}[\langle x, A^\top y / m \rangle] \\
&= \mathbf{E}[\langle Ax, y \rangle / m] \\
&= \mathbf{E}[\langle a_1, x \rangle y_1] \\
&= \mathbf{E} \mathbf{E}[y_1 \langle a_1, x \rangle | a_1] \\
&= \mathbf{E}[\theta(\langle a_1, x_u^* \rangle) \langle a_1, x \rangle] \\
&= \mathbf{E} \left[ \theta(\langle a_1, x_u^* \rangle) \langle a_1, x^\parallel + x^\perp \rangle \right] \\
&= \langle x, x_u^* \rangle \mathbf{E}[\theta(g)g], \quad g \sim N(0, 1) \\
&= \lambda \langle x, x_u^* \rangle,
\end{aligned}$$

where in the third line from the bottom  $x^\parallel = \langle x, x_u^* \rangle x_u^*$  and  $x^\perp$  denote the orthogonal projection of  $x$  on  $x_u^*$  and its orthogonal complement, respectively. We then use that  $\langle a_1, x^\perp \rangle$  and  $\langle a_1, x_u^* \rangle$  are Gaussian and uncorrelated and hence also independent random variables.  $\square$

*Proof. (Proposition 2)* Since  $\hat{x}$  is a minimizer and  $x_u^*$  is a feasible solution, we have

$$-\langle \eta, \hat{x} \rangle \leq -\langle \eta, x_u^* \rangle.$$

After re-arranging, we obtain that

$$\langle x_u^* - \hat{x}, \eta - \mathbf{E}[\eta] \rangle + \langle x_u^* - \hat{x}, \mathbf{E}[\eta] \rangle \leq 0.$$

Using Hölder's inequality and Lemma C.1, this implies

$$\begin{aligned}
\langle x_u^* - \hat{x}, \mathbf{E}[\eta] \rangle &\leq \|x_u^* - \hat{x}\|_1 \|\eta - \mathbf{E}[\eta]\|_\infty \\
\langle x_u^* - \hat{x}, \lambda x_u^* \rangle &\leq \sqrt{\|x_u^* - \hat{x}\|_0} \|x_u^* - \hat{x}\|_2 \|\eta - \mathbf{E}[\eta]\|_\infty \\
\frac{\lambda}{2} \|x_u^* - \hat{x}\|_2^2 &\leq \sqrt{2s} \|x_u^* - \hat{x}\|_2 \|\eta - \mathbf{E}[\eta]\|_\infty
\end{aligned}$$

For the last inequality, we have used that

$$\|x_u^* - \hat{x}\|_2^2 \leq 2(1 - \langle \hat{x}, x_u^* \rangle) = 2(\langle x_u^*, x_u^* \rangle - \langle \hat{x}, x_u^* \rangle) = 2(\langle x_u^*, x_u^* - \hat{x} \rangle),$$

because  $\|x_u^*\|_2 = 1$  and  $\|\hat{x}\|_2 \leq 1$ . Eventually, we obtain that

$$\|x_u^* - \hat{x}\|_2 \leq 2\sqrt{2} \frac{\Psi}{\lambda} \sqrt{\frac{s \log n}{m}},$$

with probability at least  $1 - 1/n$  by the definition of  $\Psi$ .  $\square$

## D Proof of Proposition 3

*Proof.* Consider  $\hat{s} = |\{j : |\eta_j| > \Psi \sqrt{\log(n)/m}\}|$  and the optimization problem

$$\min_{x: \|x\|_2 \leq 1, \|x\|_0 \leq \hat{s}} -\langle \eta, x \rangle.$$

Note that for  $j \notin S(x^*)$ ,  $\mathbf{E}[\eta_j] = 0$  in view of Lemma C.1, and further by the definition of  $\Psi$ , we have

$$\max_{j \notin S(x^*)} |\eta_j| \leq \Psi \sqrt{\log(n)/m}$$

with probability at least  $1 - 1/n$ . Conditional on this event, we therefore have  $S(\hat{x}) \subseteq S(x^*)$ . Similarly we have

$$\min_{j \in S(x^*)} |\eta_j| \geq |\mathbf{E}[\eta_j]| - \Psi \sqrt{\log(n)/m} = \lambda |(x_u^*)_j| - \Psi \sqrt{\log(n)/m}.$$

Thus as long as

$$\min_{j \in S(x^*)} |(x_u^*)_j| > (2\Psi/\lambda) \sqrt{\log(n)/m}$$

it holds that  $\min_{j \in S(x^*)} |\eta_j| > \Psi \sqrt{\log(n)/m}$  and consequently  $S(\hat{x}) = S(x^*)$ .  $\square$

## E Proof of Lemma 2

The proof of Lemma 2 requires three additional lemmas.

**Lemma E.1.** *Let  $g \sim N(0, 1)$  and  $\zeta : \mathbb{R} \rightarrow \mathbb{R}$  be any differentiable function satisfying  $|\zeta(x)x\phi(x)| \rightarrow 0$  as  $x \rightarrow \infty$ , where  $\phi$  denotes the standard Gaussian pdf. Then  $\mathbf{E}[\zeta(g)g] = \mathbf{E}[\zeta'(g)]$ .*

*Proof.* Observe that  $\phi'(x) = -x\phi(x)$ ,  $x \in \mathbb{R}$ . Using integration by parts we thus have

$$\begin{aligned} \mathbf{E}[\zeta(g)g] &= \int_{\mathbb{R}} x\zeta(x)\phi(x) dx = \left\{ \zeta(x)(-\phi'(x)) \right\} \Big|_{-\infty}^{\infty} + \int_{\mathbb{R}} \zeta'(x)\phi(x) dx \\ &= \int_{\mathbb{R}} \zeta'(x)\phi(x) dx = \mathbf{E}[\zeta'(g)]. \end{aligned}$$

□

**Lemma E.2.** *For all  $\alpha, \beta > 0$  and all  $\mu, \nu \in \mathbb{R}$ , one has*

$$\int_{-\infty}^{\infty} \frac{1}{\alpha} \phi\left(\frac{x-\mu}{\alpha}\right) \frac{1}{\beta} \phi\left(\frac{x-\nu}{\beta}\right) dx = \frac{1}{\sqrt{\beta^2 + \alpha^2}} \phi\left(\frac{\mu - \nu}{\sqrt{\beta^2 + \alpha^2}}\right).$$

*Proof.* Using elementary manipulations, one computes

$$\begin{aligned} &\int_{-\infty}^{\infty} \frac{1}{\alpha} \phi\left(\frac{x-\mu}{\alpha}\right) \frac{1}{\beta} \phi\left(\frac{x-\nu}{\beta}\right) dx \\ &= \frac{1}{2\pi\alpha\beta} \int_{-\infty}^{\infty} \exp\left(-\frac{(\mu-x)^2}{2\alpha^2}\right) \exp\left(-\frac{(\nu-x)^2}{2\beta^2}\right) dx \\ &= \frac{1}{2\pi\alpha\beta} \exp\left(-\frac{(\mu-\nu)^2}{2(\alpha^2 + \beta^2)}\right) \times \\ &\quad \times \int_{-\infty}^{\infty} \exp\left(-\frac{1}{2} \left( \left( \frac{\mu}{\alpha^2} + \frac{\nu}{\beta^2} \right) \left( \frac{1}{\alpha^2} + \frac{1}{\beta^2} \right) - x \right)^2 \left( \frac{1}{\alpha^2} + \frac{1}{\beta^2} \right) \right) dx \\ &= \frac{1}{2\pi\alpha\beta} \sqrt{2\pi} \frac{\alpha\beta}{\sqrt{\beta^2 + \alpha^2}} \exp\left(-\frac{(\mu-\nu)^2}{2(\alpha^2 + \beta^2)}\right) \\ &= \frac{1}{\sqrt{2\pi}} \frac{1}{\sqrt{\beta^2 + \alpha^2}} \exp\left(-\frac{(\mu-\nu)^2}{2(\alpha^2 + \beta^2)}\right). \end{aligned}$$

□

**Lemma E.3.** *Let  $h$  be a random variable with a  $N(0, \sigma^2)$ -distribution. Then for any  $a, b \in \mathbb{R} \cup \{-\infty, \infty\}$ ,  $a < b$ , we have*

$$\mathbf{E}[h|h \in (a, b)] = \sigma \frac{\phi(a/\sigma) - \phi(b/\sigma)}{\Phi(b/\sigma) - \Phi(a/\sigma)},$$

where  $\Phi$  denotes the standard Gaussian cdf.

*Proof.* We have

$$\mathbf{E}[h|h \in (a, b)] = \frac{1}{\Phi(b/\sigma) - \Phi(a/\sigma)} \int_a^b \frac{x}{\sigma} \phi(x/\sigma) dx.$$

Using the change of variables  $z = x/\sigma$  and the fact that  $\phi'(z) = -z\phi(z)$ , the result follows. □

Before finally turning to the proof of Lemma 2, let us recall the definition of the  $b$ -bit quantization map given at the end of Section 2. In that definition we have used the symmetry of the Gaussian distribution around 0 so that a partitioning of  $\mathbb{R}_+$  automatically translates into a partitioning of  $\mathbb{R}$ . For parts of the proofs, however, it is more convenient to work with the following alternative (albeit equivalent) definition.

**Definition E.1.** Define  $\mathcal{Q}_1 = -\mathcal{R}_K$ ,  $\mathcal{Q}_2 = -\mathcal{R}_{K-1}, \dots, \mathcal{Q}_K = -\mathcal{R}_1$ ,  $\mathcal{Q}_{K+k} = \mathcal{R}_k$ ,  $k \in [K]$  and  $\tilde{\mu} = (-\mu_K, \dots, \mu_1, \mu_1, \dots, \mu_K)^\top$ . Then an equivalent definition of the quantization map is given by  $z \mapsto Q(z) = \sum_{k=1}^{2K} \tilde{\mu}_k I(z \in \mathcal{Q}_k)$ . Likewise, we define  $\tilde{\mathbf{t}} = (-t_K, -t_{K-1}, \dots, t_0, t_1, \dots, t_{K-1}, t_K)^\top$ .

*Proof. (Lemma 2)* Recall that  $\lambda = \lambda_{b,\sigma} = \lambda_{b,\sigma}(\mathbf{t}, \boldsymbol{\mu})$  is defined by  $\lambda = \mathbf{E}[g\theta(g)]$ ,  $g \sim N(0, 1)$ , where the map  $\theta$  is in turn defined by the relation  $\mathbf{E}[y_1|a_1] = \theta(z_1)$  (here and below  $z_i = \langle a_i, x^* \rangle$ ,  $i \in [m]$ ). We have

$$\begin{aligned} \mathbf{E}[y_1|a_1] &= \sum_{k=1}^{2^b} \tilde{\mu}_k \mathbf{P}(y_1 \in \mathcal{Q}_k) \\ &= \sum_{k=1}^{2^b} \tilde{\mu}_k \mathbf{P}(z_1 + \varepsilon_1 \in \mathcal{Q}_k) \\ &= \sum_{k=1}^{2^b} \tilde{\mu}_k \mathbf{P}(z_1 + \varepsilon_1 \in (\tilde{t}_k, \tilde{t}_{k+1})) \\ &= \sum_{k=1}^{2^b} \tilde{\mu}_k \left\{ \Phi((\tilde{t}_{k+1} - z_1)/\sigma) - \Phi((\tilde{t}_k - z_1)/\sigma) \right\}. \end{aligned}$$

We conclude that the map  $\theta$  is defined by

$$\theta(z) = \sum_{k=1}^{2^b} \tilde{\mu}_k \left\{ \Phi((\tilde{t}_{k+1} - z)/\sigma) - \Phi((\tilde{t}_k - z)/\sigma) \right\}.$$

Next we invoke Lemma E.1 which yields  $\lambda = \mathbf{E}[z\theta(z)] = \mathbf{E}[\theta'(z)]$ . We have

$$\theta'(z) = \sum_{k=1}^{2^b} \tilde{\mu}_k \left\{ \frac{1}{\sigma} \phi((z - \tilde{t}_k)/\sigma) - \frac{1}{\sigma} \phi((z - \tilde{t}_{k+1})/\sigma) \right\}.$$

With the help of Lemma E.2, we compute

$$\begin{aligned} \mathbf{E}[\theta'(z)] &= \sum_{k=1}^{2^b} \tilde{\mu}_k \int_{\mathbb{R}} \left\{ \frac{1}{\sigma} \phi((z - \tilde{t}_k)/\sigma) - \frac{1}{\sigma} \phi((z - \tilde{t}_{k+1})/\sigma) \right\} \phi(z) dz. \\ &= \sum_{k=1}^{2^b} \tilde{\mu}_k \frac{1}{\sqrt{1 + \sigma^2}} \left\{ \phi\left(\frac{\tilde{t}_k}{\sqrt{1 + \sigma^2}}\right) - \phi\left(\frac{\tilde{t}_{k+1}}{\sqrt{1 + \sigma^2}}\right) \right\}. \end{aligned}$$

Applying Lemma E.3, the last expression can be rewritten as follows:

$$\begin{aligned}
& \sum_{k=1}^{2^b} \tilde{\mu}_k \frac{1}{\sqrt{1+\sigma^2}} \left\{ \phi \left( \frac{\tilde{t}_k}{\sqrt{1+\sigma^2}} \right) - \phi \left( \frac{\tilde{t}_{k+1}}{\sqrt{1+\sigma^2}} \right) \right\} \\
&= \sum_{k=1}^{2^b} \tilde{\mu}_k \frac{\mathbf{E}[\tilde{g} | \tilde{g} \in (\tilde{t}_k, \tilde{t}_{k+1})]}{1+\sigma^2} \left\{ \Phi \left( \tilde{t}_{k+1}/\sqrt{1+\sigma^2} \right) - \Phi \left( \tilde{t}_k/\sqrt{1+\sigma^2} \right) \right\}, \\
&\hspace{25em} \tilde{g} \sim N(0, 1+\sigma^2) \\
&= \frac{1}{1+\sigma^2} \sum_{k=1}^{2^b} \tilde{\mu}_k \mathbf{E}[\tilde{g} | \tilde{g} \in \mathcal{Q}_k] \mathbf{P}(\tilde{g} \in \mathcal{Q}_k) \\
&= \frac{1}{1+\sigma^2} \sum_{k=1}^K \mu_k \mathbf{E}[\tilde{g} | \tilde{g} \in \mathcal{R}_k] \mathbf{P}(|\tilde{g}| \in \mathcal{R}_k) \\
&= \frac{1}{1+\sigma^2} \langle \boldsymbol{\alpha}(\mathbf{t}), \mathbf{E}(\mathbf{t}) \odot \boldsymbol{\mu} \rangle,
\end{aligned}$$

where the penultimate line follows from the symmetry of the Gaussian distribution around zero; at this point, we convert the partitioning of  $\mathbb{R}$  into  $\{\mathcal{Q}_k\}_{k=1}^{2^K}$  back to the partitioning of  $\mathbb{R}_+$  into  $\{\mathcal{R}_k\}_{k=1}^K$  (cf. the remark preceding Definition E.1). The last line follows by comparison with the definitions in Lemma 2.  $\square$

## F Proof of Lemma 3

*Proof.* Let us recall the definition of  $\Psi = \Psi_{b,\sigma} = \Psi_{b,\sigma}(\mathbf{t}, \boldsymbol{\mu})$ :

$$\Psi = \inf\{C > 0 : \mathbf{P}\{\max_{1 \leq j \leq n} |\eta_j - \mathbf{E}[\eta_j]| \leq C\sqrt{\log(n)/m}\} \geq 1 - 1/n\}.$$

Expanding  $\eta_j - \mathbf{E}[\eta_j]$ , we obtain that

$$\eta_j - \mathbf{E}[\eta_j] = \frac{1}{m} \sum_{i=1}^m (A_{ij}y_i - \mathbf{E}[A_{ij}y_i]).$$

Note that since the  $A_{ij}$  are i.i.d.  $N(0, 1)$  variables while the  $\{y_i\}$  are bounded random variables, the  $\{A_{ij}y_i - \mathbf{E}[A_{ij}y_i]\}_{i=1}^m$  are i.i.d. zero-mean sub-Gaussian random variables,  $j \in [n]$ , cf. e.g. [3]. By using a standard tail bound for such random variables and a union bound over  $\{1, \dots, n\}$ ,  $C$  can be chosen proportional (i.e. up to a universal constant) to the maximum of the sub-Gaussian norms of  $\{A_{1j}y_1 - \mathbf{E}[A_{1j}y_1]\}_{j=1}^n$  [3]. In most cases, however, it is involved to compute the sub-Gaussian norm exactly. However, it is well-known that for a zero-mean Gaussian random variable, the sub-Gaussian norm is proportional to its standard deviation; the precise value of the proportionality constant is not relevant to our analysis. In the sequel, we thus resort to a normal approximation as  $|x_j^*| \rightarrow 0$ ,  $j \in [n]$ ,  $m \rightarrow \infty$ , and evaluate the standard deviation of the limiting distribution. For this purpose, we derive the pdf  $f_j$  of the random variables  $A_{1j}y_1$ ,  $j \in [n]$ . Setting  $X_j = A_{1j}$ ,  $Y = y_1$ , and using a well-known expression for the pdf of a product of random variables (cf. [2], §4.7), we obtain that

$$\begin{aligned}
f_j(z) &= \sum_{q \in \text{range}(Q)} \frac{1}{|q|} f_{X_j, Y}(z/q, q) \\
&= \sum_{q \in \text{range}(Q)} \frac{1}{|q|} f_{X_j}(z/q) \mathbf{P}(Y = q | X_j = z/q) \\
&= \sum_{k=1}^K \frac{1}{\mu_k} \phi(z/\mu_k) \{ \mathbf{P}(Y = \mu_k | X_j = z/\mu_k) + \mathbf{P}(Y = -\mu_k | X_j = z/\mu_k) \}.
\end{aligned}$$

In the second line, the joint density  $f_{X_j, Y}$  of  $(X_j, Y)$  is factorized into the marginal density of  $X_j$  and the conditional density (here discrete) of  $Y$  given  $X_j$ . In the third line, we use that the range of  $Q$  is  $\{-\mu_K, \dots, -\mu_1, \mu_1, \dots, \mu_K\}$  and that  $\phi(x) = \phi(-x)$  for all  $x \in \mathbb{R}$ . We now derive expressions for the conditional probabilities inside the curly brackets. Recall that  $Y = \mu_k$  if and only if  $\bar{Y} := \langle a_1, x^* \rangle + \sigma \varepsilon_1 \in (t_{k-1}, t_k)$ ,  $k \in [K]$ . We need to compute the probabilities of the events  $\{\bar{Y} \in (t_{k-1}, t_k) | X_j = z/\mu_k\}$  and  $\{\bar{Y} \in (-t_k, -t_{k-1}) | X_j = z/ -\mu_k\}$ . Note that  $(X_j, \bar{Y})$  follow a bivariate Gaussian distribution with mean zero and the following second moments:  $\text{Var}(X_j) = 1$ ,  $\text{Var}(\bar{Y}) = 1 + \sigma^2$ ,  $\text{Cov}(X_j, \bar{Y}) = x_j^*$ . Denoting  $\tilde{\rho} = x_j^*/\sqrt{1 + \sigma^2}$  and making use of closed form expressions for the two conditional distributions (see e.g. [1]) associated with a bivariate Gaussian distribution, we obtain for any  $k \in [K]$

$$\begin{aligned} \mathbf{P}(Y = \mu_k | X_j = z/\mu_k) &= \mathbf{P}(\bar{Y} \in (t_{k-1}, t_k) | X_j = z/\mu_k) \\ &= \Phi\left(\frac{t_k - \tilde{\rho}\sqrt{1 + \sigma^2}(z/\mu_k)}{\sqrt{1 - \tilde{\rho}^2}\sqrt{1 + \sigma^2}}\right) - \Phi\left(\frac{t_{k-1} - \tilde{\rho}\sqrt{1 + \sigma^2}(z/\mu_k)}{\sqrt{1 - \tilde{\rho}^2}\sqrt{1 + \sigma^2}}\right), \end{aligned}$$

Likewise, for any  $k \in [K]$  we have

$$\begin{aligned} \mathbf{P}(Y = -\mu_k | X_j = z/ -\mu_k) &= \mathbf{P}(\bar{Y} \in (-t_k, -t_{k-1}) | X_j = z/ -\mu_k) \\ &= \Phi\left(\frac{-t_{k-1} - \tilde{\rho}\sqrt{1 + \sigma^2}(-z/\mu_k)}{\sqrt{1 - \tilde{\rho}^2}\sqrt{1 + \sigma^2}}\right) - \Phi\left(\frac{-t_k - \tilde{\rho}\sqrt{1 + \sigma^2}(-z/\mu_k)}{\sqrt{1 - \tilde{\rho}^2}\sqrt{1 + \sigma^2}}\right) \\ &= \Phi\left(\frac{t_k - \tilde{\rho}\sqrt{1 + \sigma^2}(z/\mu_k)}{\sqrt{1 - \tilde{\rho}^2}\sqrt{1 + \sigma^2}}\right) - \Phi\left(\frac{t_{k-1} - \tilde{\rho}\sqrt{1 + \sigma^2}(z/\mu_k)}{\sqrt{1 - \tilde{\rho}^2}\sqrt{1 + \sigma^2}}\right), \end{aligned}$$

using that  $\Phi(-x) = 1 - \Phi(x)$  for all  $x \in \mathbb{R}$ . Altogether, we conclude that for all  $j \in [n]$

$$f_j(z) = \sum_{k=1}^K \frac{1}{\mu_k} \phi(z/\mu_k) 2 \left\{ \Phi\left(\frac{t_k - \tilde{\rho}\sqrt{1 + \sigma^2}(z/\mu_k)}{\sqrt{1 - \tilde{\rho}^2}\sqrt{1 + \sigma^2}}\right) - \Phi\left(\frac{t_{k-1} - \tilde{\rho}\sqrt{1 + \sigma^2}(z/\mu_k)}{\sqrt{1 - \tilde{\rho}^2}\sqrt{1 + \sigma^2}}\right) \right\}.$$

Now note that as  $|x_j^*| \rightarrow 0$ , all  $f_j$ s converge pointwise to

$$\begin{aligned} f_0(x) &= \sum_{k=1}^K \frac{1}{\mu_k} \phi(x/\mu_k) \left\{ 2(\Phi(t_k/\sqrt{1 + \sigma^2}) - \Phi(t_{k-1}/\sqrt{1 + \sigma^2})) \right\} \\ &= \sum_{k=1}^K \mathbf{P}(|\tilde{g}| \in \mathcal{R}_k(\mathbf{t})) \frac{1}{\mu_k} \phi(x/\mu_k), \quad \tilde{g} \sim N(0, 1 + \sigma^2) \\ &= \sum_{k=1}^K \alpha_k(\mathbf{t}) \frac{1}{\mu_k} \phi(x/\mu_k). \end{aligned}$$

with  $\alpha(\mathbf{t})$  as defined in Lemma 2. Observe that  $f_0$  equals the density of a Gaussian scale mixture with mixture proportions  $\alpha(\mathbf{t})$  and scales  $\{\mu_k\}_{k=1}^K$ . The standard deviation of this distribution is given by  $\sqrt{\langle \alpha(\mathbf{t}), \boldsymbol{\mu} \odot \boldsymbol{\mu} \rangle}$ .

In light of the above, we conclude that as  $|x_j^*| \rightarrow 0$ ,  $A_{1j}y_1 - \mathbf{E}[A_{1j}y_1]$  converges to the Gaussian scale mixture with density  $f_0$ ,  $j \in [n]$ . By the central limit theorem,  $\sqrt{m}(\eta_j - \mathbf{E}[\eta_j])$  converges to a Gaussian distribution with standard deviation  $\sqrt{\langle \alpha(\mathbf{t}), \boldsymbol{\mu} \odot \boldsymbol{\mu} \rangle}$  as  $m \rightarrow \infty$ ,  $j \in [n]$ . Consequently, the sub-Gaussian norm of  $\sqrt{m}(\eta_j - \mathbf{E}[\eta_j])$  is proportional to  $\sqrt{\langle \alpha(\mathbf{t}), \boldsymbol{\mu} \odot \boldsymbol{\mu} \rangle}$  as  $m \rightarrow \infty$ ,  $j \in [n]$ .  $\square$

## G Proof of Theorem 1

*Proof.* Consider the optimization problem

$$\min_{\mathbf{t}, \boldsymbol{\mu}} \Omega_b(\mathbf{t}, \boldsymbol{\mu}) = \min_{\mathbf{t}, \boldsymbol{\mu}} \frac{\Psi_b(\mathbf{t}, \boldsymbol{\mu})}{\lambda_b(\mathbf{t}, \boldsymbol{\mu})}.$$

By Lemma 2 and Lemma 3, the above minimization problem is equivalent to

$$\min_{\mathbf{t}, \boldsymbol{\mu}} R(\mathbf{t}, \boldsymbol{\mu}), \quad R(\mathbf{t}, \boldsymbol{\mu}) = \frac{\sqrt{\langle \boldsymbol{\alpha}(\mathbf{t}), \boldsymbol{\mu} \odot \boldsymbol{\mu} \rangle}}{\langle \boldsymbol{\alpha}(\mathbf{t}), \mathbf{E}(\mathbf{t}) \odot \boldsymbol{\mu} \rangle}, \quad (3)$$

where the term  $\sigma^2 + 1$  in  $\lambda_b$  has been dropped as it does not depend on  $\mathbf{t}$  or  $\boldsymbol{\mu}$ . We start by claiming that

$$R(\mathbf{t}, \boldsymbol{\mu}) \geq \frac{1}{\sqrt{\langle \boldsymbol{\alpha}(\mathbf{t}), \mathbf{E}(\mathbf{t}) \odot \mathbf{E}(\mathbf{t}) \rangle}} \quad (4)$$

for all  $\boldsymbol{\mu}$  with distinct, non-zero entries. The above lower bound is attained by choosing  $\boldsymbol{\mu} \propto \mathbf{E}(\mathbf{t})$  (note that the minimizing  $\boldsymbol{\mu}$  is only defined up to a positive constant as  $R(\mathbf{t}, c\boldsymbol{\mu}) = R(\mathbf{t}, \boldsymbol{\mu})$  for all  $c > 0$ ). Inequality (4) follows from the Cauchy-Schwarz inequality. Denote by  $\mathbf{A}(\mathbf{t})$  the diagonal matrix whose diagonal is given by the entries of  $\boldsymbol{\alpha}(\mathbf{t})$ . We then have

$$\begin{aligned} \langle \boldsymbol{\alpha}(\mathbf{t}), \mathbf{E}(\mathbf{t}) \odot \boldsymbol{\mu} \rangle &= \langle \mathbf{A}^{1/2}(\mathbf{t}) \mathbf{E}(\mathbf{t}), \mathbf{A}^{1/2}(\mathbf{t}) \boldsymbol{\mu} \rangle \\ &\leq \sqrt{\langle \mathbf{A}^{1/2}(\mathbf{t}) \mathbf{E}(\mathbf{t}), \mathbf{A}^{1/2}(\mathbf{t}) \mathbf{E}(\mathbf{t}) \rangle} \sqrt{\langle \mathbf{A}^{1/2}(\mathbf{t}) \boldsymbol{\mu}, \mathbf{A}^{1/2}(\mathbf{t}) \boldsymbol{\mu} \rangle} \end{aligned}$$

with equality holding if and only if

$$\mathbf{A}^{1/2}(\mathbf{t}) \mathbf{E}(\mathbf{t}) = c \mathbf{A}^{1/2}(\mathbf{t}) \boldsymbol{\mu} \Leftrightarrow \mathbf{E}(\mathbf{t}) = c \boldsymbol{\mu},$$

for some  $c > 0$ , where the above  $\Leftrightarrow$  follows from the fact that the entries of  $\mathbf{t}$  are required to be distinct so that the matrix  $\mathbf{A}^{1/2}$  is regular. We conclude that

$$\min_{\mathbf{t}, \boldsymbol{\mu}} R(\mathbf{t}, \boldsymbol{\mu}) = \min_{\mathbf{t}} R(\mathbf{t}, \mathbf{E}(\mathbf{t})) = \min_{\mathbf{t}} \frac{1}{\sqrt{\langle \boldsymbol{\alpha}(\mathbf{t}), \mathbf{E}(\mathbf{t}) \odot \mathbf{E}(\mathbf{t}) \rangle}}. \quad (5)$$

We will now show that the above minimization problem in  $\mathbf{t}$  is equivalent to the  $b$ -bit Lloyd-Max quantization problem of a random variable  $h \sim N(0, 1 + \sigma^2)$ , which we re-state here for convenience:

$$\min_{\mathbf{t}, \boldsymbol{\mu}} \mathbf{E}[\{h - Q(h; \mathbf{t}, \boldsymbol{\mu})\}^2] = \min_{\mathbf{t}, \boldsymbol{\mu}} \mathbf{E}[\{h - \text{sign}(h) \sum_{k=1}^K \mu_k I(|h| \in \mathcal{R}_k(\mathbf{t}))\}^2] \quad (6)$$

For the above problem, it is not hard to see that for any fixed choice of  $\mathbf{t}$ , the minimizing  $\boldsymbol{\mu}^*(\mathbf{t})$  is given by  $\mu_k^*(\mathbf{t}) = \mathbf{E}[h | h \in \mathcal{R}_k(\mathbf{t})] = E_k(\mathbf{t})$ ,  $k \in [K]$ , where we recall that  $E_k(\mathbf{t})$  is the  $k$ -th component of  $\mathbf{E}(\mathbf{t})$  as appearing above. To finish the proof of the first part of the Theorem 1, it thus remains to show that after substituting  $\boldsymbol{\mu}^*(\mathbf{t})$  back into (6), the resulting minimization problem in  $\mathbf{t}$  is equivalent to (5). We have

$$\begin{aligned} &\min_{\mathbf{t}} \mathbf{E} \left[ \left\{ h - \text{sign}(h) \sum_{k=1}^K I(|h| \in \mathcal{R}_k(\mathbf{t})) \mathbf{E}[h | h \in \mathcal{R}_k(\mathbf{t})] \right\}^2 \right] \\ &= 2 \min_{\mathbf{t}} \mathbf{E} \left[ \sum_{k=1}^K I(h \in \mathcal{R}_k(\mathbf{t})) (h - \mathbf{E}[h | h \in \mathcal{R}_k(\mathbf{t})])^2 \right] \\ &= 2 \min_{\mathbf{t}} \mathbf{E} \left[ \sum_{k=1}^K I(h \in \mathcal{R}_k(\mathbf{t})) \{h^2 - 2h \mathbf{E}[h | h \in \mathcal{R}_k(\mathbf{t})] + \mathbf{E}[h | h \in \mathcal{R}_k(\mathbf{t})]^2\} \right] \\ &= \mathbf{E}[h^2] + 2 \min_{\mathbf{t}} \left\{ -2 \sum_{k=1}^K \mathbf{E}[h | h \in \mathcal{R}_k(\mathbf{t})] \mathbf{E}[I(h \in \mathcal{R}_k(\mathbf{t}))h] + \right. \\ &\quad \left. + \sum_{k=1}^K \mathbf{P}(h \in \mathcal{R}_k(\mathbf{t})) \mathbf{E}[h | h \in \mathcal{R}_k(\mathbf{t})]^2 \right\} \\ &= 1 + \min_{\mathbf{t}} - \sum_{k=1}^K \mathbf{E}[h | h \in \mathcal{R}_k(\mathbf{t})]^2 \mathbf{P}(|h| \in \mathcal{R}_k(\mathbf{t})) \\ &= 1 + \min_{\mathbf{t}} - \langle \mathbf{E}(\mathbf{t}) \odot \mathbf{E}(\mathbf{t}), \boldsymbol{\alpha}(\mathbf{t}) \rangle, \end{aligned}$$



which establishes the equivalence to (5) as claimed.

We now prove the second part of the Theorem. Denote by  $\mathbf{t}_0^*$  the Lloyd-Max optimal thresholds for  $\sigma = 0$ , i.e. for a  $N(0, 1)$  variable. Clearly,  $\mathbf{t}^* = \mathbf{t}_\sigma^* = \sqrt{1 + \sigma^2} \mathbf{t}_0^*$  for any  $\sigma > 0$ . Evaluating  $\Omega_b(\mathbf{t}^*, \boldsymbol{\mu}^*)$ , we obtain in view of (5)

$$\begin{aligned}\Omega_b(\mathbf{t}^*, \boldsymbol{\mu}^*) &\propto \frac{1 + \sigma^2}{\sqrt{\langle \boldsymbol{\alpha}(\mathbf{t}^*), \mathbf{E}(\mathbf{t}^*) \odot \mathbf{E}(\mathbf{t}^*) \rangle}} \\ &= \frac{1 + \sigma^2}{\sqrt{\langle \boldsymbol{\alpha}(\mathbf{t}_0^* \sqrt{1 + \sigma^2}), \mathbf{E}(\mathbf{t}_0^* \sqrt{1 + \sigma^2}) \odot \mathbf{E}(\mathbf{t}_0^* \sqrt{1 + \sigma^2}) \rangle}}\end{aligned}$$

Evaluating the expression in the denominator, we obtain that

$$\alpha_k(\mathbf{t}_0^* \sqrt{1 + \sigma^2}) = \mathbf{P}(|\tilde{g}| \in \mathcal{R}_k(\mathbf{t}_0^* \sqrt{1 + \sigma^2})) = \mathbf{P}(|g| \in \mathcal{R}_k(\mathbf{t}_0^*)), \quad k \in [K],$$

where  $\tilde{g} \sim N(0, 1 + \sigma^2)$ ,  $g \sim N(0, 1)$ . Moreover, with the help of Lemma E.3

$$\begin{aligned}\mathbf{E}(\mathbf{t}_0^* \sqrt{1 + \sigma^2}) &= \left( \mathbf{E}[\tilde{g} | \tilde{g} \in \mathcal{R}_k(\mathbf{t}_0^* \sqrt{1 + \sigma^2})] \right)_{k=1}^K \\ &= \sqrt{1 + \sigma^2} \left( \mathbf{E}[g | g \in \mathcal{R}_k(\mathbf{t}_0^*)] \right)_{k=1}^K.\end{aligned}$$

Putting together the pieces, we obtain that

$$\Omega_b(\mathbf{t}^*, \boldsymbol{\mu}^*) \propto \frac{1 + \sigma^2}{\sqrt{\langle \boldsymbol{\alpha}_0(\mathbf{t}_0^*), (1 + \sigma^2) \mathbf{E}_0(\mathbf{t}_0^*) \odot \mathbf{E}_0(\mathbf{t}_0^*) \rangle}} = \frac{\sqrt{1 + \sigma^2}}{\sqrt{\lambda_{b,0}(\mathbf{t}_0^*, \boldsymbol{\mu}_0^*)}}$$

where the  $\boldsymbol{\alpha}_0(\mathbf{t})$ ,  $\mathbf{E}_0(\mathbf{t})$  and  $\lambda_{b,0}(\mathbf{t}, \boldsymbol{\mu})$  refer to the definitions of  $\boldsymbol{\alpha}(\mathbf{t})$ ,  $\mathbf{E}(\mathbf{t})$ ,  $\lambda_b(\mathbf{t}, \boldsymbol{\mu})$  for  $\sigma = 0$ . This completes the proof.  $\square$

## H Derivations for the paragraph 'Beyond additive noise'

We fix  $\sigma = 0$  and the corresponding Lloyd-Max optimal choices  $\mathbf{t} = \mathbf{t}_0^*$ ,  $\boldsymbol{\mu} = \boldsymbol{\mu}_0^*$  so that  $\mu_k = \mathbf{E}[g | g \in \mathcal{R}_k]$ ,  $g \sim N(0, 1)$  with  $\mathcal{R}_k = \mathcal{R}_k(\mathbf{t}_0^*)$ ,  $k \in [K]$ .

*Mechanism (I)*

In order to evaluate  $\lambda = \lambda_{b,p}$ , we first need to derive an expression for the corresponding map  $\theta$ . Recalling Definition E.1, we have

$$\mathbf{E}[y_1 | a_1] = (1 - p) \sum_{k=1}^{2^b} \tilde{\mu}_k I(\langle a_1, x^* \rangle \in \mathcal{Q}_k) + p \frac{1}{2^b - 1} \sum_{k=1}^{2^b} \tilde{\mu}_k I(\langle a_1, x^* \rangle \notin \mathcal{Q}_k)$$

and thus

$$\theta(z) = (1 - p) \sum_{k=1}^{2^b} \tilde{\mu}_k I(z \in \mathcal{Q}_k) + p \frac{1}{2^b - 1} \sum_{k=1}^{2^b} \tilde{\mu}_k I(z \notin \mathcal{Q}_k)$$

It follows that for  $g \sim N(0, 1)$

$$\begin{aligned}
\lambda_{b,p} &= \mathbf{E}[g \theta(g)] = \sum_{k=1}^{2^b} \tilde{\mu}_k \left\{ (1-p) \mathbf{E}[g I(g \in \mathcal{Q}_k)] + p \frac{1}{2^b-1} \mathbf{E}[g I(g \notin \mathcal{Q}_k)] \right\} \\
&= \sum_{k=1}^{2^b} \tilde{\mu}_k \left\{ (1-p) \mathbf{E}[g I(g \in \mathcal{Q}_k)] + p \frac{1}{2^b-1} \mathbf{E}[g(1 - I(g \in \mathcal{Q}_k))] \right\} \\
&= \sum_{k=1}^{2^b} \tilde{\mu}_k \left\{ (1-p) - \frac{p}{2^b-1} \right\} \mathbf{E}[g I(g \in \mathcal{Q}_k)] \\
&= \sum_{k=1}^K \mathbf{P}(|g| \in \mathcal{R}_k) \mathbf{E}[g|g \in \mathcal{R}_k]^2 \left\{ (1-p) - \frac{p}{2^b-1} \right\} \\
&= \langle \boldsymbol{\alpha}_0(\mathbf{t}_0^*), \mathbf{E}_0(\mathbf{t}_0^*) \odot \mathbf{E}_0(\mathbf{t}_0^*) \rangle \left\{ (1-p) - \frac{p}{2^b-1} \right\} \\
&= \lambda_{b,0} \left\{ (1-p) - \frac{p}{2^b-1} \right\},
\end{aligned}$$

where  $\boldsymbol{\alpha}_0(\mathbf{t}_0^*)$  and  $\mathbf{E}_0(\mathbf{t}_0^*)$  are defined at the end of the preceding proof. From the last expression we deduce the breakdown point  $\bar{p}_b = 1 - 1/2^b$ .

For evaluating  $\Psi_{b,p}$  (up to a positive constant), we make use of the asymptotic expression  $\Psi_{b,0} \propto \sqrt{\langle \boldsymbol{\alpha}(\mathbf{t}), \boldsymbol{\mu} \odot \boldsymbol{\mu} \rangle}$  derived in Lemma 3. The only thing that changes under Mechanism (I) are the probabilities  $\boldsymbol{\alpha}(\mathbf{t})$  which become

$$\alpha_k(\mathbf{t}) = \mathbf{P}(|g| \in \mathcal{R}_k(\mathbf{t}))(1-p) + \frac{p}{2^b-1} \sum_{l \neq k} \mathbf{P}(|g| \in \mathcal{R}_l(\mathbf{t})), \quad k \in [K].$$

*Mechanism (II)*

Following the same route as for Mechanism (I), one derives

$$\theta(z) = (1-p) \sum_{k=1}^{2^b} \tilde{\mu}_k I(z \in \mathcal{Q}_k) + p \{-\mu_K I(z \geq 0) + \mu_K I(z < 0)\}$$

and accordingly for  $g \sim N(0, 1)$

$$\begin{aligned}
\lambda_{b,p} &= \mathbf{E}[g \theta(g)] = (1-p) \sum_{k=1}^K \mathbf{P}(|g| \in \mathcal{R}_k) \mathbf{E}[g|g \in \mathcal{R}_k]^2 - p \mu_K \mathbf{E}[g|g > 0] \\
&= (1-p) \lambda_{b,0} - p \mu_K \sqrt{2/\pi}
\end{aligned}$$

so that the breakdown points results as  $\bar{p}_b = \lambda_{b,0}/(\lambda_{b,0} + \mu_K \sqrt{2/\pi})$ . As for Mechanism (II),  $\Psi_{b,p}$  is obtained by evaluating the changes in  $\boldsymbol{\alpha}(\mathbf{t})$ . We have

$$\begin{aligned}
\alpha_k(\mathbf{t}) &= (1-p) \mathbf{P}(|g| \in \mathcal{R}_k(\mathbf{t})), \quad k \in [K-1], \\
\alpha_K(\mathbf{t}) &= p \sum_{k=1}^{K-1} \mathbf{P}(|g| \in \mathcal{R}_k(\mathbf{t})) + \mathbf{P}(|g| \in \mathcal{R}_K(\mathbf{t})).
\end{aligned}$$

## I Proof of Proposition 4

*Proof.* In the sequel, we derive tail bounds of the form

$$\begin{aligned}
\mathbf{P}(\hat{\psi} \geq (1+\varepsilon)\psi^*) &\leq \exp(-cm\varepsilon^2), \\
\mathbf{P}(\hat{\psi} \leq (1-\varepsilon)\psi^*) &\leq \exp(-2cm\varepsilon^2).
\end{aligned}$$

for  $\varepsilon \in (0, 1)$  and  $c = 2\{\phi'(t/\psi^*)\}^2$ . This implies that the probability of the event

$$\left| \frac{\hat{\psi}}{\psi^*} - 1 \right| > \varepsilon$$

is upper bounded by  $2 \exp(-c m \varepsilon^2)$ .

### 1) Upper tail

$$\begin{aligned} \mathbf{P}(\hat{\psi} \geq (1 + \varepsilon)\psi^*) &= \mathbf{P}\left(\frac{t_1}{\Phi^{-1}\left(\frac{1}{2}\left(1 + \frac{m_1}{m}\right)\right)} \geq (1 + \varepsilon)\psi^*\right) \\ &= \mathbf{P}\left(\frac{m_1}{m} \leq 2\Phi\left(\frac{t_1}{(1 + \varepsilon)\psi^*}\right) - 1\right) \\ &= \mathbf{P}\left(\frac{m_1}{m} - \mathbf{E}\left[\frac{m_1}{m}\right] \leq 2\left\{\Phi\left(\frac{t_1}{(1 + \varepsilon)\psi^*}\right) - \Phi\left(\frac{t_1}{\psi^*}\right)\right\}\right) \end{aligned}$$

We have

$$\begin{aligned} \Phi\left(\frac{t_1}{(1 + \varepsilon)\psi^*}\right) - \Phi\left(\frac{t_1}{\psi^*}\right) &= - \int_{t_1/(\psi^*(1 + \varepsilon))}^{t_1/\psi^*} \phi(u) \, du \\ &\leq -\phi(t_1/\psi^*) \frac{t_1}{\psi^*} \frac{\varepsilon}{\varepsilon + 1} \\ &\leq -\phi(t_1/\psi^*) \frac{t_1}{\psi^*} \frac{\varepsilon}{2} = \phi'(t_1/\psi^*) \frac{\varepsilon}{2}. \end{aligned}$$

for  $\varepsilon \in (0, 1)$ . Thus

$$\mathbf{P}(\hat{\psi} \geq (1 + \varepsilon)\psi^*) \leq \mathbf{P}\left(\frac{m_1}{m} - \mathbf{E}\left[\frac{m_1}{m}\right] \leq \varepsilon \phi'(t_1/\psi^*)\right)$$

### 2) Lower tail

Similarly, we obtain that

$$\mathbf{P}(\hat{\psi} \leq (1 - \varepsilon)\psi^*) \leq \mathbf{P}\left(\frac{m_1}{m} - \mathbf{E}\left[\frac{m_1}{m}\right] \geq 2\left\{\Phi\left(\frac{t_1}{(1 - \varepsilon)\psi^*}\right) - \Phi\left(\frac{t_1}{\psi^*}\right)\right\}\right)$$

We have

$$\Phi\left(\frac{t_1}{(1 - \varepsilon)\psi^*}\right) - \Phi\left(\frac{t_1}{\psi^*}\right) = \int_{t_1/\psi^*}^{t_1/(\psi^*(1 - \varepsilon))} \phi(u) \, du \geq \phi(t_1/\psi^*) \frac{t_1}{\psi^*} \frac{\varepsilon}{1 - \varepsilon} \geq -\phi'(t_1/\psi^*) \varepsilon.$$

Thus,

$$\mathbf{P}(\hat{\psi} \leq (1 - \varepsilon)\psi^*) \leq \mathbf{P}\left(\frac{m_1}{m} - \mathbf{E}\left[\frac{m_1}{m}\right] \leq 2\varepsilon(-\phi'(t_1/\psi^*))\right).$$

Note that  $m_1$  is a Binomial random variable. Applying Hoeffding's inequality to **1)** and **2)**, we obtain that

$$\begin{aligned} \mathbf{P}(\hat{\psi} \geq (1 + \varepsilon)\psi^*) &\leq \exp(-2m\varepsilon^2\{\phi'(t_1/\psi^*)\}^2) \\ \mathbf{P}(\hat{\psi} \leq (1 - \varepsilon)\psi^*) &\leq \exp(-4m\varepsilon^2\{\phi'(t_1/\psi^*)\}^2). \end{aligned}$$

which proves the claim made above.  $\square$

## References

- [1] A. DasGupta. *Fundamentals of Probability: A First Course*. Springer, 2010.

- [2] G. Grimmett and D. Stirzaker. *Probability and Random Processes*. Oxford University Press, 2001.
- [3] R. Vershynin. *In: Compressed Sensing: Theory and Applications*, chapter 'Introduction to the non-asymptotic analysis of random matrices'. Cambridge University Press, 2012.
- [4] M. Wainwright. Sharp thresholds for noisy and high-dimensional recovery of sparsity using  $\ell_1$ -constrained quadratic programming (Lasso). *IEEE Transactions on Information Theory*, 55:2183–2202, 2009.
